# Supplementary material
Source: PubMed Central journal article supplement (PMC6661437)
Supplement: zoolstud-54-050-s001.pdf [file zoolstud-54-050-s001.pdf]

## Specimens origin.

Examined specimens of *Lontra longicaudis* for the mandible. National Mammal Collection of the Biological Institute of the Autonomous National University of Mexico (NMC-UNAM), Vertebrate Collection of the Autonomous University of Campeche (VC-AUC), Mammal Collection of the Biological Research Station of Los Tuxtlas, Autonomous National University of Mexico (MCT-UNAM), American Natural History Museum (ANHM), Carnegie Museum of Natural History (CM), Field Museum of Chicago (FIELD), National Museum of Natural History-Smithsonian (SM), Museum of Michigan State University (MSU), Mammal Collection of Kansas University (KU), and private collections (PC).

| COLLECTION | SPECIMEN     | SUBSPECIES         | SEX | COLLECTION | SPECIMEN      | SUBSPECIES         | SEX |
|------------|--------------|--------------------|-----|------------|---------------|--------------------|-----|
| NMC-UNAM   | 14544        | <i>annectens</i>   | M   | FIELD      | 44333         | <i>annectens</i>   | F   |
| VC-AUC     | 720          | <i>annectens</i>   | ?   | FIELD      | 93535         | <i>enudris</i>     | F   |
| MCT-UNAM   | 393          | <i>annectens</i>   | M   | FIELD      | 93536         | <i>enudris</i>     | M   |
| ANHM       | 98589        | <i>enudris</i>     | M   | FIELD      | 68321         | <i>enudris</i>     | F   |
| ANHM       | 23507        | <i>annectens</i>   | ?   | FIELD      | 68320         | <i>enudris</i>     | F   |
| ANHM       | 142247       | <i>annectens</i>   | H   | FIELD      | 25262         | <i>enudris</i>     | F   |
| ANHM       | 14633        | <i>annectens</i>   | ?   | FIELD      | 78461         | <i>enudris</i>     | ?   |
| ANHM       | 142248       | <i>annectens</i>   | M   | FIELD      | 98079         | <i>enudris</i>     | M   |
| ANHM       | 23494        | <i>annectens</i>   | F   | FIELD      | 88481         | <i>annectens</i>   | F   |
| ANHM       | 29840        | <i>annectens</i>   | M   | FIELD      | 69582         | <i>annectens</i>   | M   |
| ANHM       | 6042/4765    | <i>enudris</i>     | F   | FIELD      | 62262         | <i>annectens</i>   | F   |
| ANHM       | 6678         | <i>annectens</i>   | M   | FIELD      | 16554         | <i>enudris</i>     | ?   |
| ANHM       | 123270       | <i>annectens</i>   | ?   | SM         | 337825        | <i>annectens</i>   | M   |
| ANHM       | 38121        | <i>annectens</i>   | F   | SM         | 171080        | <i>annectens</i>   | F   |
| ANHM       | 29841        | <i>annectens</i>   | M   | SM         | 172996        | <i>annectens</i>   | M   |
| ANHM       | 33191        | <i>annectens</i>   | F   | SM         | 283883        | <i>annectens</i>   | ?   |
| ANHM       | 63958        | <i>annectens</i>   | ?   | SM         | 290886        | <i>annectens</i>   | M   |
| ANHM       | 80092        | <i>enudris</i>     | M   | SM         | 310675        | <i>annectens</i>   | F   |
| ANHM       | 96286        | <i>enudris</i>     | F   | SM         | 537639        | <i>annectens</i>   | F   |
| ANHM       | 67099        | <i>enudris</i>     | M   | SM         | 336214        | <i>annectens</i>   | F   |
| ANHM       | 261319/8747A | <i>enudris</i>     | ?   | SM         | 362300        | <i>annectens</i>   | F   |
| ANHM       | 41940        | <i>enudris</i>     | ?   | SM         | 255133        | <i>enudris</i>     | M   |
| ANHM       | 74458        | <i>enudris</i>     | F   | SM         | 194325        | <i>enudris</i>     | F   |
| ANHM       | 73673        | <i>enudris</i>     | ?   | SM         | 277415        | <i>enudris</i>     | ?   |
| ANHM       | 48178        | <i>enudris</i>     | ?   | SM         | 406529        | <i>enudris</i>     | M   |
| ANHM       | 214498       | <i>enudris</i>     | ?   | SM         | 442900        | <i>enudris</i>     | M   |
| ANHM       | 61436        | <i>enudris</i>     | M   | SM         | 443486        | <i>enudris</i>     | M   |
| ANHM       | 71860        | <i>enudris</i>     | F   | SM         | 012198/A14198 | <i>annectens</i>   | F   |
| ANHM       | 230840       | <i>enudris</i>     | ?   | SM         | 172997        | <i>longicaudis</i> | M   |
| ANHM       | 71861        | <i>enudris</i>     | M   | SM         | 256381        | <i>longicaudis</i> | ?   |
| ANHM       | 133949       | <i>longicaudis</i> | F   | SM         | A15968        | <i>annectens</i>   | ?   |
| ANHM       | 133950       | <i>longicaudis</i> | F   | SM         | 36057         | <i>annectens</i>   | M   |
| ANHM       | 205902       | <i>longicaudis</i> | F   | SM         | 009425/A21093 | <i>annectens</i>   | M   |
| CM         | 1355         | <i>annectens</i>   | M   | SM         | 010351/A12184 | <i>annectens</i>   | M   |
| CM         | 4955         | <i>enudris</i>     | M   | MSU        | 11913         | <i>annectens</i>   | F   |
| CM         | 4929         | <i>enudris</i>     | M   | MSU        | 11934         | <i>annectens</i>   | M   |
| CM         | 6358         | <i>enudris</i>     | M   | MSU        | 14376         | <i>annectens</i>   | F   |
| CM         | 3221         | <i>annectens</i>   | F   | MSU        | 14377         | <i>annectens</i>   | M   |
| CM         | 1494         | <i>annectens</i>   | F   | KU         | 83587         | <i>annectens</i>   | F   |
| CM         | 1332         | <i>annectens</i>   | F   | KU         | 105878        | <i>annectens</i>   | F   |
| FIELD      | 34950        | <i>annectens</i>   | F   | KU         | 90986         | <i>annectens</i>   | F   |
| FIELD      | 28124        | <i>enudris</i>     | F   | KU         | 32225         | <i>annectens</i>   | F   |
| FIELD      | 18912        | <i>annectens</i>   | M   | KU         | 24548         | <i>annectens</i>   | M   |
|            |              |                    |     | PC         | N/A           | <i>annectens</i>   | M   |

Examined specimens of *Lontra longicaudis* for the cranium. National Mammal Collection of the Biological Institute of the Autonomous National University of Mexico (NMC-UNAM), Vertebrate Collection of the Autonomous University of Campeche (VC-AUC), Mammal Collection of the Biological Research Station of Los Tuxtlas, Autonomous National University of Mexico (MCT-UNAM), American Natural History Museum (ANHM), Carnegie Museum of Natural History (CM), Field Museum of Chicago (FIELD), National Museum of Natural History-Smithsonian (SM), Museum of Michigan State University (MSU), Mammal Collection of Kansas University (KU), and private collections (PC).

| COLLECTION | SPECIMEN  | SUBSPECIES         | SEX | COLLECTION | SPECIMEN      | SUBSPECIES       | SEX |
|------------|-----------|--------------------|-----|------------|---------------|------------------|-----|
| VC-AUC     | 720       | <i>annectens</i>   | M   | FIELD      | 93535         | <i>enudris</i>   | F   |
| MCT-UNAM   | 393       | <i>annectens</i>   | M   | FIELD      | 93536         | <i>enudris</i>   | M   |
| ANHM       | 98589     | <i>enudris</i>     | M   | FIELD      | 68321         | <i>enudris</i>   | F   |
| ANHM       | 142247    | <i>annectens</i>   | F   | FIELD      | 68320         | <i>enudris</i>   | F   |
| ANHM       | 142248    | <i>annectens</i>   | M   | FIELD      | 25262         | <i>enudris</i>   | F   |
| ANHM       | 23494     | <i>annectens</i>   | F   | FIELD      | 78461         | <i>enudris</i>   | ?   |
| ANHM       | 29840     | <i>annectens</i>   | M   | FIELD      | 69582         | <i>annectens</i> | M   |
| ANHM       | 6042/4765 | <i>enudris</i>     | F   | FIELD      | 62262         | <i>annectens</i> | F   |
| ANHM       | 6678      | <i>annectens</i>   | M   | FIELD      | 16554         | <i>enudris</i>   | ?   |
| ANHM       | 38121     | <i>annectens</i>   | F   | SM         | 281479        | <i>annectens</i> | ?   |
| ANHM       | 29841     | <i>annectens</i>   | M   | SM         | 337825        | <i>annectens</i> | M   |
| ANHM       | 33191     | <i>annectens</i>   | F   | SM         | 171080        | <i>annectens</i> | F   |
| ANHM       | 63958     | <i>annectens</i>   | ?   | SM         | 172996        | <i>annectens</i> | M   |
| ANHM       | 80092     | <i>enudris</i>     | M   | SM         | 290886        | <i>annectens</i> | M   |
| ANHM       | 96286     | <i>enudris</i>     | F   | SM         | 336214        | <i>annectens</i> | F   |
| ANHM       | 67099     | <i>enudris</i>     | M   | SM         | 362300        | <i>annectens</i> | F   |
| ANHM       | 41940     | <i>enudris</i>     | ?   | SM         | 255133        | <i>enudris</i>   | M   |
| ANHM       | 74458     | <i>enudris</i>     | F   | SM         | 194325        | <i>enudris</i>   | F   |
| ANHM       | 73673     | <i>enudris</i>     | ?   | SM         | 406529        | <i>enudris</i>   | M   |
| ANHM       | 214498    | <i>enudris</i>     | ?   | SM         | 442900        | <i>enudris</i>   | M   |
| ANHM       | 71860     | <i>enudris</i>     | F   | SM         | 443486        | <i>enudris</i>   | M   |
| ANHM       | 71861     | <i>enudris</i>     | M   | SM         | 012198/A14198 | <i>annectens</i> | F   |
| ANHM       | 133949    | <i>longicaudis</i> | F   | SM         | A15968        | <i>annectens</i> | ?   |
| ANHM       | 133950    | <i>longicaudis</i> | F   | SM         | 009425/A21093 | <i>annectens</i> | M   |
| ANHM       | 205902    | <i>longicaudis</i> | F   | SM         | 010351/A12184 | <i>annectens</i> | M   |
| CM         | 1355      | <i>annectens</i>   | M   | MSU        | 11913         | <i>annectens</i> | F   |
| CM         | 83587     | <i>annectens</i>   | F   | MSU        | 11934         | <i>annectens</i> | M   |
| CM         | 105878    | <i>annectens</i>   | F   | MSU        | 14376         | <i>annectens</i> | F   |
| CM         | 90986     | <i>annectens</i>   | F   | KU         | 90986         | <i>annectens</i> | F   |
| CM         | 3221      | <i>annectens</i>   | F   | KU         | 32225         | <i>annectens</i> | F   |
| CM         | 1494      | <i>annectens</i>   | F   | PC         | 92.3.14.8     | <i>annectens</i> | M   |
| CM         | 1332      | <i>annectens</i>   | F   | PC         | s/n           | <i>annectens</i> | M   |
